# Supplementary material for: Efficacy and Safety of Alemtuzumab Through 9 Years of Follow-up in Patients with Highly Active Disease: Post Hoc Analysis of CARE-MS I and II Patients in the TOPAZ Extension Study
Source: Springer Nature journal article supplement (doi:10.1007/s40263-020-00749-x), 2020-07-24
Supplement: MOESM1 [file 24116146]

## **Efficacy and Safety of Alemtuzumab Through 9 Years of Follow-up in Patients with Highly Active Disease: Post Hoc Analysis of CARE-MS I and II Patients in the TOPAZ Extension Study**

Tjalf Ziemssen<sup>1</sup>, Ann D Bass<sup>2</sup>, Regina Berkovich<sup>3,4</sup>, Giancarlo Comi<sup>5</sup>, Sara Eichau<sup>6</sup>, Jeremy Hobart<sup>7</sup>, Samuel F Hunter<sup>8</sup>, Christopher LaGanke<sup>9</sup>, Volker Limmroth<sup>10</sup>, Daniel Pelletier<sup>4</sup>, Carlo Pozzilli<sup>11</sup>, Sven Schippling<sup>12</sup>, Livia Sousa<sup>13</sup>, Anthony Traboulsee<sup>14</sup>, Bernard MJ Uitdehaag<sup>15</sup>, Bart Van Wijmeersch<sup>16</sup>, Zia Choudhry<sup>17</sup>, Nadia Daizadeh<sup>17</sup>, Barry A Singer<sup>18</sup>; on behalf of the CARE-MS I, CARE-MS II, CAMMS03409, and TOPAZ investigators

<sup>1</sup>Center of Clinical Neuroscience, University Clinic Carl Gustav Carus, Dresden, Germany

<sup>2</sup>Neurology Center of San Antonio, San Antonio, TX, USA

<sup>3</sup>Regina Berkovich, MD, PhD, Inc., West Hollywood, CA, USA

<sup>4</sup>Keck School of Medicine of University of Southern California, Los Angeles, CA, USA

<sup>5</sup>Ospedale San Raffaele, Milan, Italy

<sup>6</sup>Hospital Universitario Virgen Macarena, Seville, Spain

<sup>7</sup>Plymouth University Peninsula Schools of Medicine and Dentistry, Plymouth, UK

<sup>8</sup>Advanced Neurosciences Institute, Franklin, TN, USA

<sup>9</sup>North Central Neurology Associates, Cullman, AL, USA

<sup>10</sup>Klinik für Neurologie und Palliativmedizin, Cologne, Germany

<sup>11</sup>Department of Human Neuroscience, Sapienza University of Rome, Rome, Italy

<sup>12</sup>Neuroimmunology and Multiple Sclerosis Research, University Hospital Zürich and University of Zürich, Zürich, Switzerland

<sup>13</sup>Centro Hospitalar e Universitário de Coimbra, Coimbra, Portugal

<sup>14</sup>University of British Columbia, Vancouver, BC, Canada

<sup>15</sup>Amsterdam University Medical Centers, Amsterdam, The Netherlands

<sup>16</sup>Rehabilitation and MS-Centre Overpelt, BIOMED, Hasselt University, Hasselt, Belgium

<sup>17</sup>Sanofi, Cambridge, MA, USA

<sup>18</sup>MS Center for Innovations in Care, Missouri Baptist Medical Center, St Louis, MO, USA

**Correspondence to:**

Tjalf Ziemssen, MD

Zentrum für Klinische Neurowissenschaften

Fetscherstr. 74, 01307 Dresden, Germany

E-Mail: Tjalf.Ziemssen@uniklinikum-dresden.de

Phone: +49-351-458-4465

ORCID: 0000-0001-8799-8202

**SUPPLEMENTAL TABLES**

**Supplementary Table 1** Total follow-up time through Year 9 in CARE-MS I, CARE-MS II, and pooled CARE-MS I and II alemtuzumab-treated HAD patients

|                                     | HAD Patients           |                         |                                         |
|-------------------------------------|------------------------|-------------------------|-----------------------------------------|
|                                     | CARE-MS I<br>(N = 105) | CARE-MS II<br>(N = 103) | Pooled<br>CARE-MS I and II<br>(N = 208) |
| Total follow-up time, patient-years | 927.1                  | 823.2                   | 1750.3                                  |
| Mean (SD)                           | 8.8 (2.4)              | 8.0 (2.6)               | 8.4 (2.6)                               |
| Median (range)                      | 9.8 (1.3–11.1)         | 9.2 (1.1–10.6)          | 9.5 (1.1–11.1)                          |

*CARE-MS* Comparison of Alemtuzumab and Rebif Efficacy in Multiple Sclerosis, *HAD* highly active disease, *SD* standard deviation

**Supplementary Table 2** Efficacy through 9 years in alemtuzumab-treated patients from the pooled CARE-MS I and II studies

| Parameter                                                                                               | Alemtuzumab-Treated Patients                     |
|---------------------------------------------------------------------------------------------------------|--------------------------------------------------|
|                                                                                                         | CARE-MS Overall<br>(Pooled Studies)<br>(N = 811) |
| Proportion of patients who received neither additional alemtuzumab nor another DMT in the extensions, % | 48                                               |
| Proportion of patients who received additional alemtuzumab, %                                           | 49 <sup>a</sup>                                  |
| 3 total courses, %                                                                                      | 26 <sup>a</sup>                                  |
| 4 total courses, %                                                                                      | 14 <sup>a</sup>                                  |
| 5 total courses, %                                                                                      | 6 <sup>a</sup>                                   |
| 6 total courses, %                                                                                      | 2 <sup>a</sup>                                   |
| 7 total courses, %                                                                                      | 0.5 <sup>a</sup>                                 |
| 8 total courses, %                                                                                      | 0.1 <sup>a</sup>                                 |
| ARR over Y3–9 (95 % CI)                                                                                 | 0.17 (0.15 to 0.19)                              |
| Proportion of patients relapse-free over Y3–9, % (95 % CI) <sup>b</sup>                                 | 50 (46 to 54)                                    |
| Mean EDSS score change over Y0–9 (95 % CI)                                                              | 0.21 (0.09 to 0.33)                              |
| Proportion of patients with improved or stable EDSS over Y0–9 <sup>c</sup> , %                          | 72 (improved, 22; stable, 51)                    |
| Proportion of patients free of 6-Month CDW over Y0–9, % (95 % CI)                                       | 64 (60 to 67)                                    |
| Proportion of patients with 6-Month CDI over Y0–9, % (95 % CI)                                          | 45 (41 to 50)                                    |
| Proportion of patients free of MRI disease activity in Y9, % (95 % CI) <sup>b</sup>                     | 70 (66 to 74)                                    |

|                                                                                |                        |
|--------------------------------------------------------------------------------|------------------------|
| Proportion of patients with NEDA in Y9, % (95 % CI) <sup>b</sup>               | 62 (58 to 67)          |
| Proportion of patients with cumulative NEDA over Y3–9, % (95% CI) <sup>b</sup> | 18 (14 to 21)          |
| Median BPF change over Y0–9, % (95 % CI)                                       | -1.65 (-1.81 to -1.48) |

<sup>a</sup> N=742; <sup>b</sup> CIs were calculated using the Wald method; <sup>c</sup> values may not sum appropriately due to rounding;

Improved EDSS score:  $\geq 1.0$ -point decrease from core study baseline; stable EDSS score:  $\leq 0.5$ -point change in either direction from core study baseline.

CDW:  $\geq 1.0$ -point EDSS increase from core study baseline (or  $\geq 1.5$  points if baseline EDSS = 0) confirmed over 6 months

CDI:  $\geq 1.0$ -point EDSS decrease from core study baseline confirmed over 6 months (assessed only in patients with baseline EDSS score  $\geq 2.0$ )

Freedom from MRI disease activity: no new Gd-enhancing T1 lesions on current MRI and no new/enlarging T2 hyperintense lesions since last MRI

NEDA: absence of relapse, 6-month CDW, and MRI disease activity

ARR annualized relapse rate, BPF brain parenchymal fraction, CARE-MS Comparison of Alemtuzumab and Rebif Efficacy in Multiple Sclerosis, CDI

confirmed disability improvement, CDW confirmed disability worsening, CI confidence interval, DMT disease-modifying therapy, EDSS Expanded Disability

Status Scale, Gd gadolinium, MRI magnetic resonance imaging, NEDA no evidence of disease activity, Y year

**Supplementary Table 3** AE incidence over Years 0–9 in the overall alemtuzumab-treated populations from CARE-MS I and II

| AEs, n (%)                  | Alemtuzumab-Treated Patients Over Years 0–9 |                                    |
|-----------------------------|---------------------------------------------|------------------------------------|
|                             | CARE-MS I<br>Overall<br>(N = 376)           | CARE-MS II<br>Overall<br>(N = 435) |
| Any AE                      | 370 (98.4)                                  | 434 (99.8)                         |
| Serious AEs                 | 144 (38.3)                                  | 195 (44.8)                         |
| Infections                  | 313 (83.2)                                  | 382 (87.8)                         |
| Serious infections          | 25 (6.6)                                    | 52 (12.0)                          |
| Autoimmune AEs <sup>a</sup> |                                             |                                    |
| Thyroid AEs                 | 174 (46.3)                                  | 190 (43.7)                         |
| Serious thyroid AEs         | 24 (6.4)                                    | 23 (5.3)                           |
| ITP                         | 6 (1.6)                                     | 16 (3.7)                           |
| Nephropathies               | 1 (0.3)                                     | 2 (0.5)                            |
| Malignancies                | 9 (2.4)                                     | 8 (1.8)                            |
| Deaths                      | 7 (1.9)                                     | 9 (2.1)                            |

<sup>a</sup> First occurrence of AE within the time period  
 AE adverse event, CARE-MS Comparison of Alemtuzumab and Rebif Efficacy in Multiple Sclerosis,  
 Gd gadolinium, ITP immune thrombocytopenia
